# Supplementary material for: Development and validation of a multi-residue method for the simultaneous analysis of brominated and organophosphate flame retardants, organochlorine pesticides, and polycyclic aromatic compounds in household dust
Source: Royal Society of Chemistry journal article supplement (doi:10.1039/d1ay00860a), 2021-01-01
Supplement: d1ay00860a1.pdf [file d1ay00860a1.pdf]

## Supporting Information

1

### 2 **Development and validation of a multi-residue method for the simultaneous** 3 **analysis of brominated and organophosphate flame retardants, organochlorine** 4 **pesticides, and polycyclic aromatic compounds in household dust**

5 Wenrui Zhang <sup>a\*</sup>, Yonghui Wang <sup>a</sup>, Meilu Hao <sup>a</sup>, Biao Kong <sup>a</sup>, Peng Liang <sup>b</sup>, Yan Yang <sup>c</sup> and  
6 Shengtao Ma<sup>\*</sup>

7 <sup>a</sup> *College of Safety and Environmental Engineering, Shandong University of Science and*  
8 *Technology, Qingdao, Shandong 266590, P.R. China.*

9 <sup>b</sup> *College of Chemical and Biological Engineering, Shandong University of Science and*  
10 *Technology, Qingdao, Shandong 266590, P.R. China.*

11 <sup>c</sup> *Guangdong-Hong Kong-Macao Joint Laboratory for Contaminants Exposure and Health,*  
12 *Guangdong Key Laboratory of Environmental Catalysis and Health Risk Control, Institute of*  
13 *Environmental Health and Pollution control, Guangdong University of Technology, Guangzhou*  
14 *510006, P.R. China.*

15 *\*Corresponding Author,*

16 *Tel: +86 15253263237; E-mail:wenrui.mao@163.com*

17 *Tel: +86 18680582828; E-mail:mast@gdut.edu.cn*

18

#### 19 **This supporting information consists of five sections:**

20 1. GC-NCI-MS for the analysis of PBDEs

21 2. LC-ESI-MS/MS for the analysis of HBCDs

22 3. Elution behavior of six classes of compounds (Fig.S1)

23 4. Spiking experiments (Table S1, Fig.S2, and Fig.S3 )

24 5. Comparisons of concentrations of six classes of compounds in SRM 2585 (Table S2)

25

## 26 **1. GC-NCI-MS for the analysis of PBDEs**

27 PBDEs in sample extracts were determined using an Agilent 7890A series gas chromatograph  
28 coupled with an Agilent 5975C mass spectrometer (GC-MS). Selected ion monitoring (SIM) in  
29 negative chemical ionization (NCI) mode was used for quantification. A non-polar DB-5HT  
30 column (15 m × 0.25 mm, i.d.; 0.10 μm film thickness; J&W Scientific, Folsom, CA, USA) was  
31 used to determine PBDE congeners. The GC injection port was held at 280 °C. Methane was used  
32 as the chemical ionization reagent gas and helium as the carrier gas at a flow rate of 1.2 mL/min.  
33 The ion source and interface temperatures were set at 250 °C and 290 °C, respectively. The GC  
34 oven temperature program was set as follows: held at 110 °C for 5 min, 20 °C/min to 200 °C, held  
35 for 4.5 min, and then 7.5 °C/min to 300 °C, held for 16 min. The following ions were monitored:  
36 m/z 79 and 81 for tri- to nona-BDEs, m/z 486.7 and 488.7 for BDE-209, and m/z 494.7 for <sup>13</sup>C-  
37 BDE-209, respectively.

## 38 **2. LC-ESI-MS/MS for the analysis of HBCDs**

39 HBCDs were analyzed using an Agilent 1100 series liquid chromatograph (Agilent  
40 Technologies, Palo Alto, CA) coupled to an Applied Biosystems/Sciex API 4000 triple quadrupole  
41 mass spectrometer (Applied Biosystems, Foster City, CA). A Zorbax SB-C18 reversed-phase  
42 column (4.6 × 250 mm, 5 μm, Agilent) was used for separating HBCD diastereomers. Injection of  
43 a 10 μL sample was conducted with an automatic sampler. The nozzle voltage was set at 500 V  
44 for negative ESI modes, and the capillary voltage was set at 3500 V. The mobile phase were water  
45 (A), MeOH (B) and acetonitrile (C). The flow rate was 0.5 mL/min. The gradient elution program  
46 was initialized with 10:80:10 A/B/C (V/V), ramped to 10:50:40 A/B/C within 18 min, then to  
47 30:70 B/C at 23 min and hold on 7 min, then returned to 10:80:10 A/B/C over 8 min, finally

48 allowed column equilibrium in 6 min for the next run. The MS/MS transitions of  $m/z$  640.6 $\rightarrow$ 79  
49 and 652.6 $\rightarrow$ 79 were monitored for the three native and  $^{13}\text{C}_{12}$ -labeled HBCD isomers, respectively.

### 50 **3. Elution behavior of the six compound classes**

51 To identify appropriate elution solvents, we evaluated the elution behavior of six classes of  
52 compounds on Florisil-1 g/6 mL. Recovery experiments were performed with six mixtures of  
53 standards and four eluents: A-3 $\times$ 4 mL of Hex; B-3 $\times$ 4 mL of Hex/DCM (1:1, v/v); C-3 $\times$ 4 mL of  
54 DCM, and D-3 $\times$ 4 mL of EtAc. The resulting fractions were concentrated to approximately 500  $\mu\text{L}$   
55 and then transferred to cell bottles. The washing solvents for each tube were also transferred to the  
56 corresponding cell bottles. After this solvent combination, each eluate was evaporated and  
57 reconstituted in 200  $\mu\text{L}$  Hex for determination of PBDEs, PAHs, OCPs and Musks. The fractions  
58 were then evaporated to dryness under a gentle stream of nitrogen and resolubilized in MeOH for  
59 determination of HBCDs and OPEs by LC-MS/MS. [Fig.S1](#) shows that the recovery of compounds  
60 from the Florisil-1 g/6 mL SPE cartridge increased with the solvent polarity.

61

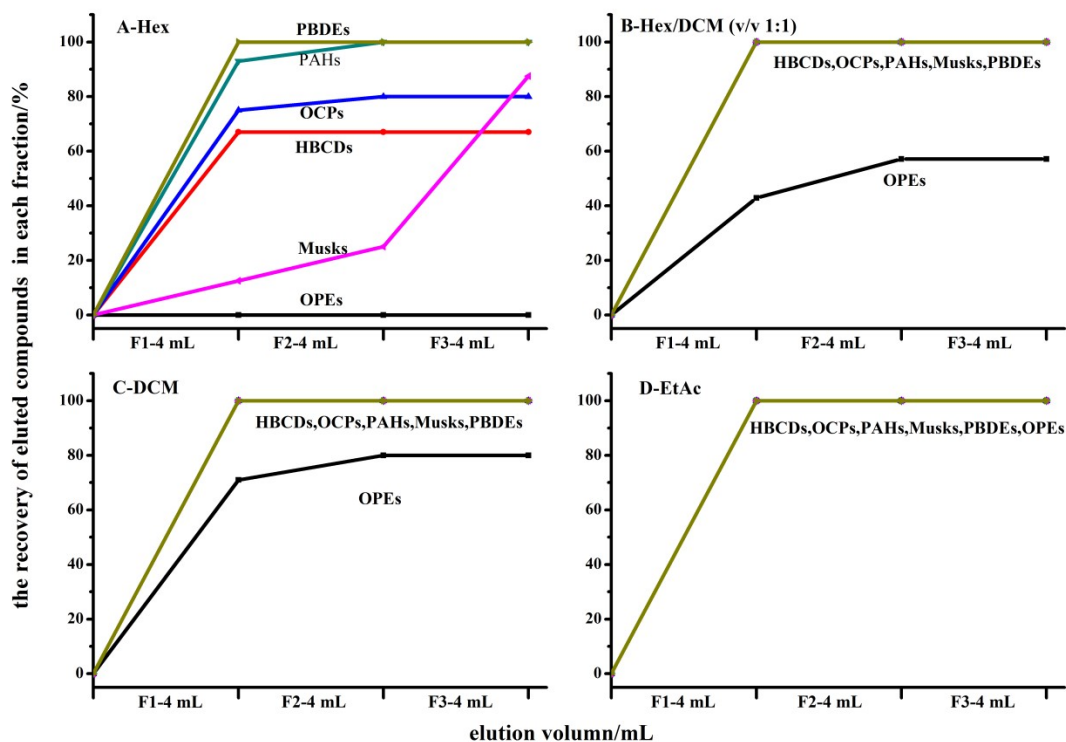

62

63 **Fig.S1.** The elution behavior of six compound mixtures on Florisil-1 g/6 mL SPE:  
 64 A-3×4 mL Hex (F1-F3); B-3×4 mL Hex/DCM (v/v 1:1) (F1-F3); C-3×4 mL DCM (F1-F3); D-3×4 mL EtAc  
 65 (F1-F3)  
 66

#### 67 4. Spiking experiments

68 The final method was validated by performing spiking experiments based on pre-extracted  
 69 matrix blank on Florisil SPE cartridges at three concentration levels ( $Q_{low}$ ,  $Q_{middle}$  and  $Q_{high}$ ) with  
 70 three replicates per level. Recoveries were calculated by dividing by the calculated concentration  
 71 of a mixed solution of standards (in which the overall concentration of the standard solution was  
 72 equal to the concentration level chosen for the spiking experiment). For PAHs, Musks and OPEs,  
 73 the low, middle, and high concentration levels were 50, 500, and 2500 ng/g respectively. For  
 74 OCPs, they were 10, 100, and 500 ng/g. For HBCDs, the spiking levels were 5, 50, and 100 ng/g.  
 75 For PBDEs, the spiking levels were 5, 20, and 100 ng/g. The average recoveries and relative  
 76 standard deviations (RSD) for six compound classes at three different concentration levels are

77 presented in Table S1. The target analytes were in both solvent and matrix blank were below the  
 78 detection limited. A typical chromatogram was added in SI (Fig. S2).

79 **Table S1** Average recoveries and relative standard deviations (RSD) for six classes of analytes at three  
 80 different concentration levels (ng/g)

| Name        |                | Average recovery $\pm$ RSD, % (n = 3) |                  |               |
|-------------|----------------|---------------------------------------|------------------|---------------|
|             |                | High level:100                        | Middle level: 20 | Low level:5   |
| PBDEs       | BDE-28         | 105 $\pm$ 2%                          | 108 $\pm$ 0%     | 103 $\pm$ 3%  |
|             | BDE-47         | 103 $\pm$ 3%                          | 106 $\pm$ 1%     | 109 $\pm$ 3%  |
|             | BDE-100        | 107 $\pm$ 1%                          | 112 $\pm$ 2%     | 106 $\pm$ 2%  |
|             | BDE-99         | 111 $\pm$ 2%                          | 109 $\pm$ 2%     | 108 $\pm$ 4%  |
|             | BDE-154        | 107 $\pm$ 2%                          | 107 $\pm$ 5%     | 104 $\pm$ 4%  |
|             | BDE-153        | 111 $\pm$ 3%                          | 105 $\pm$ 9%     | 107 $\pm$ 1%  |
|             | BDE-183        | 113 $\pm$ 5%                          | 105 $\pm$ 5%     | 99 $\pm$ 3%   |
|             | BDE-209        | 111 $\pm$ 12%                         | 100 $\pm$ 14%    | 112 $\pm$ 10% |
| HBCDs       |                | High level:100                        | Middle level:50  | Low level:5   |
|             | $\alpha$ -HBCD | 94 $\pm$ 4%                           | 95 $\pm$ 2%      | 99 $\pm$ 5%   |
|             | $\beta$ -HBCD  | 89 $\pm$ 4%                           | 105 $\pm$ 1%     | 96 $\pm$ 3%   |
|             |                |                                       |                  |               |
|             |                | High level:2500                       | Middle level:500 | Low level:50  |
| PAHs        | Ace            | 83 $\pm$ 6%                           | 74 $\pm$ 4%      | 71 $\pm$ 6%   |
|             | Dih            | 85 $\pm$ 7%                           | 74 $\pm$ 4%      | 74 $\pm$ 7%   |
|             | Flu            | 88 $\pm$ 5%                           | 76 $\pm$ 3%      | 105 $\pm$ 12% |
|             | Phen           | 93 $\pm$ 5%                           | 76 $\pm$ 1%      | 87 $\pm$ 4%   |
|             | Ant            | 93 $\pm$ 4%                           | 77 $\pm$ 2%      | 76 $\pm$ 8%   |
|             | Flua           | 98 $\pm$ 5%                           | 90 $\pm$ 2%      | 83 $\pm$ 5%   |
|             | Pyr            | 101 $\pm$ 6%                          | 92 $\pm$ 3%      | 85 $\pm$ 9%   |
|             | BaA            | 113 $\pm$ 6%                          | 106 $\pm$ 3%     | 92 $\pm$ 8%   |
|             | Chry           | 108 $\pm$ 7%                          | 114 $\pm$ 2%     | 97 $\pm$ 10%  |
|             | BaF            | 107 $\pm$ 5%                          | 99 $\pm$ 5%      | 93 $\pm$ 11%  |
|             | BkF            | 81 $\pm$ 3%                           | 109 $\pm$ 7%     | 95 $\pm$ 12%  |
|             | BaP            | 93 $\pm$ 3%                           | 110 $\pm$ 2%     | 113 $\pm$ 12% |
|             | IcdP           | 111 $\pm$ 9%                          | 97 $\pm$ 2%      | 116 $\pm$ 17% |
|             | BghiP          | 110 $\pm$ 9%                          | 106 $\pm$ 10%    | 115 $\pm$ 10% |
| DahA        | 120 $\pm$ 9%   | 102 $\pm$ 10%                         | 113 $\pm$ 16%    |               |
| Musks       |                | High level:2500                       | Middle level:500 | Low level:50  |
|             | DPMI           | 120 $\pm$ 11%                         | 90 $\pm$ 9%      | 98 $\pm$ 8%   |
|             | ADBI           | 89 $\pm$ 6%                           | 79 $\pm$ 5%      | 79 $\pm$ 6%   |
|             | AHMI           | 93 $\pm$ 5%                           | 80 $\pm$ 4%      | 77 $\pm$ 8%   |
|             | ATII           | 102 $\pm$ 8%                          | 113 $\pm$ 4%     | 92 $\pm$ 12%  |
|             | HHCB           | 95 $\pm$ 6%                           | 84 $\pm$ 4%      | 89 $\pm$ 7%   |
|             | musk xylene    | 88 $\pm$ 7%                           | 82 $\pm$ 2%      | 66 $\pm$ 13%  |
|             | AHTN           | 95 $\pm$ 7%                           | 83 $\pm$ 4%      | 80 $\pm$ 9%   |
| musk ketone | 102 $\pm$ 7%   | 83 $\pm$ 2%                           | 77 $\pm$ 12%     |               |

Table S1 (continued)

| Name     |                     | Average recovery $\pm$ RSD, % (n = 3) |                  |              |
|----------|---------------------|---------------------------------------|------------------|--------------|
|          |                     | High level:500                        | Middle level:100 | Low level:10 |
| OCPs     | $\alpha$ -BHC       | 86 $\pm$ 8%                           | 77 $\pm$ 8%      | 71 $\pm$ 3%  |
|          | $\beta$ -BHC        | 97 $\pm$ 7%                           | 87 $\pm$ 9%      | 74 $\pm$ 6%  |
|          | $\gamma$ -BHC       | 86 $\pm$ 7%                           | 78 $\pm$ 8%      | 72 $\pm$ 4%  |
|          | $\delta$ -BHC       | 90 $\pm$ 6%                           | 85 $\pm$ 12%     | 75 $\pm$ 4%  |
|          | Heptachlor          | 93 $\pm$ 4%                           | 75 $\pm$ 10%     | 78 $\pm$ 8%  |
|          | Aldrin              | 92 $\pm$ 7%                           | 84 $\pm$ 9%      | 75 $\pm$ 17% |
|          | Heptachlor epoxide  | 100 $\pm$ 7%                          | 95 $\pm$ 8%      | 87 $\pm$ 6%  |
|          | $\gamma$ -Chlordane | 100 $\pm$ 8%                          | 94 $\pm$ 9%      | 76 $\pm$ 7%  |
|          | $\alpha$ -Chlordane | 101 $\pm$ 7%                          | 97 $\pm$ 10%     | 82 $\pm$ 2%  |
|          | Endosulfan I        | 100 $\pm$ 6%                          | 91 $\pm$ 9%      | 85 $\pm$ 7%  |
| p,p'-DDE | 112 $\pm$ 5%        | 95 $\pm$ 10%                          | 87 $\pm$ 6%      |              |

|      |                    |                 |                  |              |
|------|--------------------|-----------------|------------------|--------------|
|      | Dieldrin           | 102 ± 5%        | 105 ± 6%         | 86 ± 13%     |
|      | Endrin             | 107 ± 4%        | 107 ± 13%        | 90 ± 17%     |
|      | Endosulfan II      | 108 ± 10%       | 104 ± 8%         | 82 ± 3%      |
|      | p,p'-DDD           | 106 ± 7%        | 100 ± 8%         | 77 ± 8%      |
|      | Endrin aldehyde    | 92 ± 5%         | 97 ± 7%          | 66 ± 12%     |
|      | Endosulfan sulfate | 108 ± 7%        | 97 ± 7%          | 82 ± 9%      |
|      | p,p'-DDT           | 122 ± 8%        | 116 ± 14%        | 107 ± 12%    |
|      | Endrin ketone      | 106 ± 7%        | 107 ± 8%         | 79 ± 10%     |
|      | Methoxychlor       | 116 ± 9%        | 116 ± 8%         | 102 ± 14%    |
|      |                    | High level:2500 | Middle level:500 | Low level:50 |
| OPEs | TBP                | 86 ± 3%         | 87 ± 4%          | 79 ± 3%      |
|      | TCEP               | 87 ± 3%         | 83 ± 14%         | 119 ± 6%     |
|      | TCPP               | 85 ± 3%         | 85 ± 6%          | 127 ± 5%     |
|      | TDCPP              | 80 ± 1%         | 94 ± 4%          | 120 ± 10%    |
|      | TPhP               | 92 ± 5%         | 95 ± 2%          | 92 ± 9%      |
|      | TBEP               | 97 ± 3%         | 99 ± 6%          | 82 ± 4%      |
|      | TCP                | 100 ± 2%        | 90 ± 9%          | 120 ± 8%     |

81

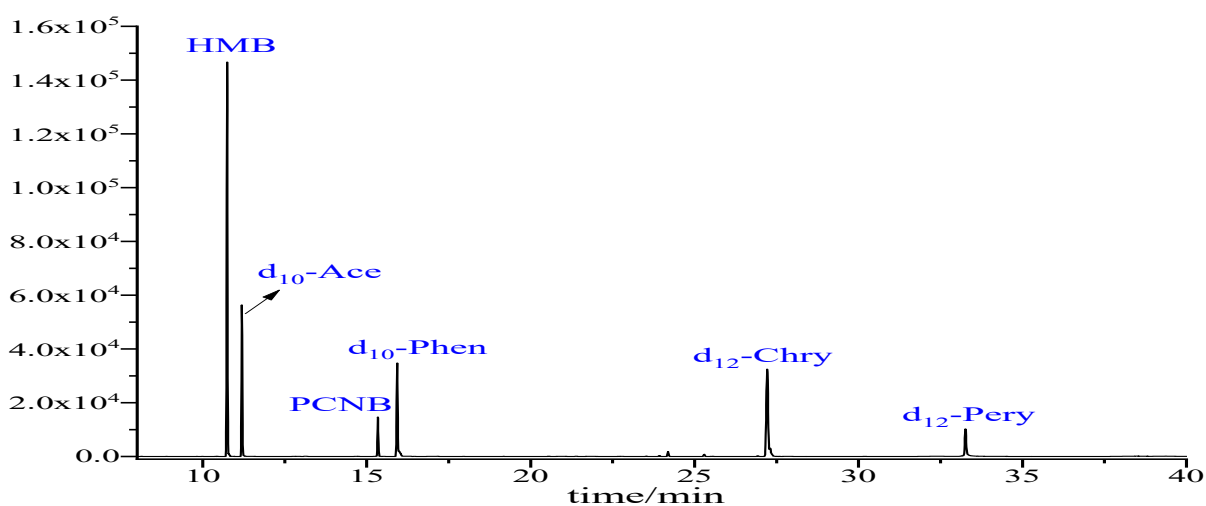

82

83 Fig. S2 Total ion chromatogram (TIC) of a pre-extracted matrix blank for PAHs analysis by GC-EI-MS/MS.

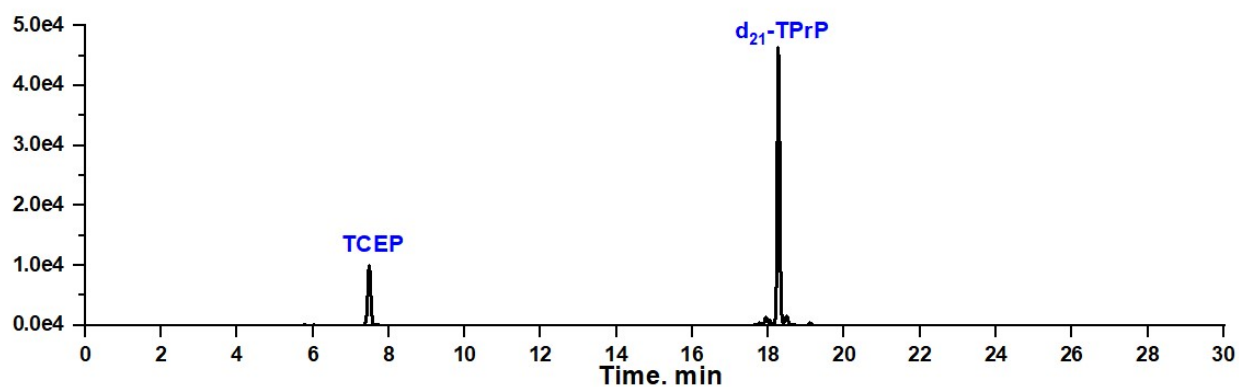

84

85 Fig. S3 Total ion chromatogram (TIC) of a method blank sample for OPEs analysis by LC-MS/MS.

## 86 5. Comparisons of concentrations of six classes of compounds in SRM 2585

87 The dust used to prepare the Standard Reference Material (SRM) 2585 was collected in 1993-1994

88 from US homes, cleaning services, motels and hotels. There are two important advantages of using  
 89 this reference material: (1) its matrix effects closely resemble those of real dust samples, and (2)  
 90 its concentrations of several target FRs (PBDEs) are certified. It is therefore widely used to  
 91 evaluate the performance of analytical methods for the determination of selected polycyclic  
 92 aromatic hydrocarbons (PAHs), polychlorinated biphenyl (PCB) congeners, chlorinated  
 93 pesticides, and polybrominated diphenyl ether (PBDE) congeners in household dust and similar  
 94 matrices. The analyte concentrations range from approximately 10 to 4,500 ng/g for PAHs, 4 to  
 95 300 ng/g for chlorinated pesticides, and 4 to 2,500 ng/g for BDE congeners. No certified or  
 96 reference concentrations exist for Musks and OPEs, but indicative values have been reported in  
 97 the literature for some of these compounds. The concentrations determined using our new method  
 98 are compared to previously reported concentrations and certified/indicative concentrations for  
 99 SRM 2585 in [Table S2](#).

100

101 [Table S2](#) Concentrations (all in ng/g dust) of six classes of compounds previously reported in literature  
 102 together with the results of the present study in SRM2585 compared to the certified/indicative Values

|       |         | Reference <sup>1</sup> | Reference <sup>2</sup> | Reference <sup>3</sup> | This study | Certified values <sup>4</sup>  |
|-------|---------|------------------------|------------------------|------------------------|------------|--------------------------------|
| PBDEs | BDE-28  | 45.8±3.1               | 35±2                   | 32.8±1.1               | 50.9 ± 2.6 | 46.9 ± 4.4                     |
|       | BDE-47  | 506 ±54                | 390±36                 | 409±11                 | 499 ± 46   | 497 ± 46                       |
|       | BDE-100 | 154±29                 | 110±14                 | 116±3                  | 151 ± 4    | 145 ± 11                       |
|       | BDE-99  | 873±58                 | 680±86                 | 742±33                 | 937 ± 39   | 892 ± 53                       |
|       | BDE-154 | 76.2±10.5              | 70±6                   | 77.2±2.7               | 90.6 ± 3.5 | 83.5 ± 2.0                     |
|       | BDE-153 | 137±24                 | 90±12                  | 97±2                   | 121 ± 9    | 119 ± 1                        |
|       | BDE-183 | 38±4                   | 25±2                   | 32.3±4.8               | 41.9 ± 1.6 | 43.0 ± 3.5                     |
|       | BDE-209 | 2149±1205              | 2480±500               | 2150±231               | 2682 ± 163 | 2510 ± 190                     |
| HBCDs |         | Reference <sup>5</sup> | Reference <sup>3</sup> |                        | This study | Indicative values <sup>6</sup> |
|       | α-HBCD  | 19.0±3.6               | 19.0±9.0               |                        | 20.4 ± 2.2 | 19.0 ± 3.7                     |
|       | β-HBCD  | 4.4±0.4                | 4.2±1.4                |                        | 4.8 ± 0.3  | 4.3 ± 1.1                      |
|       | γ-HBCD  | 125±18                 | 119±42                 |                        | 115 ± 9.6  | 120 ± 22                       |
| PAHs  |         | Reference <sup>1</sup> | Reference <sup>7</sup> | Reference <sup>8</sup> | This study | Certified values <sup>4</sup>  |
|       | Phen    | 1514±206               | 1670±84                | 1818±145               | 1795± 148  | 1920 ± 20                      |
|       | Ant     | 106±31                 | 182±15                 | 267±5.3                | 93.2 ± 3.8 | 96.0 ± 5.2                     |
|       | Fluo    | 3477±93                | 4280±428               | 3110±280               | 3805 ±218  | 4380 ± 100                     |
|       | Pyr     | 2723±116               | 3330±466               | 2154±237               | 2864 ±272  | 3290 ± 30                      |
|       | BaA     | 1001±443               | /                      | /                      | 1145 ± 60  | 1160 ± 54                      |
|       | Chry    | 2929±1356              | /                      | /                      | 2357 ±139  | 2260 ± 60                      |
|       | BbF     | 1402±268               | /                      | /                      | 2765 ±234  | 2700 ± 90                      |
| BkF   | 582±231 | /                      | /                      | 1289 ±38               | 1330 ± 70  |                                |

|       |             |                        |                         |                         |            |                                 |
|-------|-------------|------------------------|-------------------------|-------------------------|------------|---------------------------------|
|       | BaP         | 674±41                 | 906±54                  | 879±62                  | 1333 ±30   | 1140 ± 10                       |
|       | IcdP        | 2167±634               | /                       | /                       | 2064 ±118  | 2080 ± 100                      |
|       | BghiP       | 1948±995               | /                       | /                       | 2159 ±109  | 2280 ± 40                       |
|       | DahA        | 832±450                | /                       | /                       | 336 ±29    | 301 ± 50                        |
|       |             | Reference <sup>9</sup> | Reference <sup>10</sup> | Reference <sup>11</sup> | This study | Indicative values <sup>12</sup> |
| Musks | ADBI        | 105±9                  | 162±8                   | /                       | 122.8± 9.4 | 150.0±15.7                      |
|       | AHMI        | 152±26                 | 196±12                  | /                       | 239.2±18.9 | 202.0±25.2                      |
|       | ATII        | 100±14                 | 142±9                   | /                       | 147.3± 8.4 | 139.0±5.81                      |
|       | HHCB        | 1220±143               | 1410±80                 | /                       | 1461± 6    | 1460 ± 67                       |
|       | musk xylene | 705±60                 | /                       | 946±14                  | 910.1± 6.9 | 895.0±57.2                      |
|       | AHTN        | 1420±169               | 1680±90                 | /                       | 1702± 11   | 1650 ± 88                       |
|       | musk ketone | 436±61                 | /                       | 491±8                   | 544.5± 9.2 | 477.0±29.7                      |

103 Table S2 (continued)

|      |                    | Reference <sup>7</sup> | Reference <sup>13</sup> | This study  | Certified Values <sup>4</sup>   |
|------|--------------------|------------------------|-------------------------|-------------|---------------------------------|
| OCPs | δ-BHC              | <65.8                  | /                       | 3.87±13.35  | 4.06± 0.55                      |
|      | Heptachlor         | 113±21                 | /                       | 113 ± 6     | 166 ± 34                        |
|      | Heptachlor epoxide | /                      | /                       | 10.2 ± 11.3 | 11.3 ± 0.6                      |
|      | γ-Chlordane        | 170±17                 | /                       | 171 ± 6     | 174 ± 45                        |
|      | α-Chlordane        | 322±35                 | 165±4                   | 303 ± 9     | 277 ± 96                        |
|      | p,p'-DDE           | 191±17                 | 213±6                   | 283 ± 6     | 261 ± 2                         |
|      | Dieldrin           | 93±19                  | /                       | 97 ± 7      | 88 ± 21                         |
|      | p,p'-DDD           | /                      | 35.5±4.1                | 26.4 ± 7.6  | 27.3 ± 0.8                      |
|      | p,p'-DDT           | 123±28                 | 84±2.3                  | 129 ± 5     | 111 ± 23                        |
|      |                    | Reference <sup>3</sup> | Reference <sup>14</sup> | This study  | Indicative values <sup>15</sup> |
| OPEs | TBP                | 190±10                 | 190±20                  | 187±9       | 180 ± 20                        |
|      | TCEP               | 680±60                 | 840±60                  | 743±98      | 700 ± 170                       |
|      | TCPP               | 860±70                 | 880±140                 | 846±65      | 820 ± 100                       |
|      | TDCPP              | 3180±70                | 2300±280                | 2225±136    | 2020 ± 260                      |
|      | TBEP               | 63000±2000             | 82000±6500              | 49216±3966  | 49000 ± 9600                    |
|      | TCP                | 1140±30                | 1100±100                | 1166±112    | 1070 ± 110                      |

104 “/”- no values for this compound

105

106 **Reference:**

- 107 1. R. Piazza, A. Gambaro, E. Argiriadis, M. Vecchiato, S. Zambon, P. Cescon and C. Barbante, *Anal. Bioanal.*  
108 *Chem.*, 2013, 405, 917-932.
- 109 2. A. C. Ionas and A. Covaci, *Int. J. Environ. Anal. Chem.*, 2013, 93, 1074-1083.
- 110 3. N. Van den Eede, A. C. Dirtu, N. Ali, H. Neels and A. Covaci, *Talanta*, 2012, 89, 292-300.
- 111 4. National Institute of Standards & Technology, Certificate of Analysis, Standard Reference Material 2585,  
112 2018.
- 113 5. M. A.-E. Abdallah, S. Harrad, C. Ibarra, M. Diamond, L. Melymuk, M. Robson and A. Covaci, *Environ. Sci.*  
114 *Tech.*, 2007, 42, 459-464.
- 115 6. J. M. Keller, H. M. Stapleton, R. Heltsley, A. Peck, J. R. Kucklick, M. M. Schantz and S. A. Wise, *Poster*  
116 *presented at 4<sup>th</sup> International Workshop on Brominated Flame Retardants, Amsterdam, 2007.*
- 117 7. F. Mercier, E. Gilles, G. Saramito, P. Gloennec and B. Le Bot, *J. Chromatogr. A*, 2014, 1336, 101-111.
- 118 8. F. Mercier, P. Gloennec, O. Blanchard and B. Le Bot, *J. Chromatogr. A*, 2012, 1254, 107-114.
- 119 9. C. Kubwabo, X. H. Fan, P. E. Rasmussen and F. Wu, *Anal. Bioanal. Chem.*, 2012, 404, 467-477.
- 120 10. J. L. Reiner, International Symposium on Halogenated Persistent Organic Pollutants, *Dioxin2010*.
- 121 11. J. Regueiro, M. Llompert, C. Garcia-Jares and R. Cela, *J. Chromatogr. A*, 2007, 1174, 112-124.
- 122 12. A. Peck, J. Kucklick and M. Schantz, *Anal. Bioanal. Chem.*, 2007, 387, 2381-2388.
- 123 13. N. Ali, N. Van den Eede, A. C. Dirtu, H. Neels and A. Covaci, *Indoor Air*, 2012, 22, 200-211.



- 124 14. C. Bergh, G. Luongo, S. Wise and C. Östman, *Anal. Bioanal. Chem.*, 2012, 402, 51-59.
- 125 15. N. Van den Eede, A. C. Dirtu, H. Neels and A. Covaci, *Environ. Int.*, 2011, 37, 454-461.
